# Supplementary material for: New Insights into the Diversity and Pathogenicity of Fusarium Species Causing Carnation Wilt in Lam Dong, Vietnam
Source: Research Square preprint supplement (doi:10.21203/rs.3.rs-6859853/v1), 2025-06-13
Supplement: Supplementary file 1 [file 10dca9cae5177eb41b10ac31.xlsx]

## Sheet: Sheet1
	Isola	C5131	C5912	C5911	C5921	C2111	C2121	C2131	C4911	C4921	C4931	C5612	C1611	C1612	C2132	C5331	C5621	C5631	C5821	C5811	C5831	C3221
Colony	Round	0	0	0	0	0	0	0	0	0	0	0	1	1	1	1	1	1	1	1	1	1
	Irregular	1	1	1	1	1	1	1	1	1	1	1	0	0	0	0	0	0	0	0	0	0
	Many air-hyphae	1	1	1	1	1	1	1	1	1	1	1	0	0	0	0	0	0	0	0	0	0
	Little air-hyphae	0	0	0	0	0	0	0	0	0	0	0	1	1	1	1	1	1	1	1	1	1
	White pigment	0	0	0	0	0	0	0	0	0	0	0	1	1	1	1	1	1	1	1	1	0
	Purple pigment	0	0	0	0	0	0	0	0	0	0	0	0	0	0	0	0	0	0	0	0	1
	Brown pigment	1	1	1	1	1	1	1	1	1	1	1	0	0	0	0	0	0	0	0	0	0
Microconidia	0-1 septae	0	0	0	0	0	0	0	0	0	0	0	1	1	1	1	1	1	1	1	1	1
	0-2 septae	1	1	1	1	0	0	0	0	0	0	0	0	0	0	0	0	0	0	0	0	0
	1-2 septae	0	0	0	0	1	1	1	1	1	1	1	0	0	0	0	0	0	0	0	0	0
	Elipsoid	1	1	1	1	0	0	0	0	0	0	0	1	1	1	1	1	1	1	1	1	1
	Allantoid/reniform	1	1	1	1	0	0	0	0	0	0	0	1	1	1	1	1	1	1	1	1	0
	oblong	1	1	1	1	0	0	0	0	0	0	0	0	0	0	0	0	0	0	0	0	1
	Like-maggot	0	0	0	0	0	0	0	0	0	0	0	1	1	1	1	1	1	1	1	1	0
Macroconidia	Wider middle	1	1	1	1	1	1	1	1	1	1	1	0	0	0	0	0	0	0	0	0	0
	Parallel sides	0	0	0	0	0	0	0	0	0	0	0	1	1	1	1	1	1	1	1	1	1
	Septation pattern	1	1	1	1	1	1	1	1	1	1	1	0	0	0	0	0	0	0	0	0	0
	Straight	0	0	0	0	0	0	0	0	0	0	0	1	1	1	1	1	1	1	1	1	1
	Curved	1	1	1	1	1	1	1	1	1	1	1	0	0	0	0	0	0	0	0	0	0
	Slight-curved	0	0	0	0	0	0	0	0	0	0	0	1	1	1	1	1	1	1	1	1	1
	Notched-basal	0	0	0	0	0	0	0	0	0	0	0	1	1	1	1	1	1	1	1	1	1
	Pedicellate-basal	0	0	0	0	0	0	0	0	0	0	0	1	1	1	1	1	1	1	1	1	1
	Barely notched-basal	1	1	1	1	1	1	1	1	1	1	1	1	1	1	1	1	1	1	1	1	1
	Foot-shape basal	0	0	0	0	0	0	0	0	0	0	0	1	1	1	1	1	1	1	1	1	1
	Blunt-rounded apical	1	1	1	1	1	1	1	1	1	1	1	1	1	1	1	1	1	1	1	1	1
	Slightly-hooked apical	1	1	1	1	1	1	1	1	1	1	1	1	1	1	1	1	1	1	1	1	1
Chlamydospore	Presence	1	1	1	1	0	0	0	0	0	0	0	1	1	1	1	1	1	1	1	1	1
	Pseudo-chlamydospore	0	0	0	0	1	1	1	1	1	1	1	0	0	0	0	0	0	0	0	0	0
	Single	1	1	1	1	0	0	0	0	0	0	0	1	1	1	1	1	1	1	1	1	1
	In-pairs	0	0	0	0	0	0	0	0	0	0	0	0	0	0	0	0	0	0	0	0	1
Conidiophore	Unbranched	0	0	0	0	0	0	0	0	0	0	0	1	1	1	1	1	1	1	1	1	1
	Mostly branched	1	1	1	1	1	1	1	1	1	1	1	0	0	0	0	0	0	0	0	0	1
	Rarely branched	0	0	0	0	0	0	0	0	0	0	0	0	0	0	0	0	0	0	0	0	1
	Short phialides	1	1	1	1	1	1	1	1	1	1	1	1	1	1	1	1	1	1	1	1	1
Sporodochia	Presence	0	0	0	0	0	0	0	0	0	0	0	1	1	1	1	1	1	1	1	1	1
Measurement	Grown rate	3.695	3.36667	4.09167	2.795	3.64667	3.24833	2.8	3.02167	3.78833	4.59333	2.89667	3.63	3.49167	4.645	3.51833	3.49667	3.88167	3.63833	3.73833	3.74667	2.565
	Macroconidia leangth	33.21	35.86	30.91	32.41	31.55	32.18	31.84	31.67	32.4	30.37	32	24.53	25.12	24.38	25.69	25.21	24.73	24.86	26.11	24.58	23.67
	Macroconidia width	4.55	4.53	4.7	4.36	5.14	4.97	5.54	5.58	5.34	5.5	5.63	3.94	4.11	3.99	4.33	4.41	3.96	4.28	4.16	4.07	4.19
	Microconidia length	14.69	16.92	16.12	15.95	20.15	21.17	20.34	21.11	20.48	20	20.29	8.25	7.97	8.94	7.22	6.66	8.48	8.61	8.33	7.89	7.3
	Microconidia width	4.86	5.2	4.75	5.17	3.84	3.73	3.86	3.78	3.95	3.81	4.11	2.26	2.37	2.39	2.43	2.24	2.31	2.45	2.41	2.4	2.95
	Chlarmydospore	7.14	7.25	7.56	7.34	0	0	0	0	0	0	0	6.96	7.21	7.56	7.17	7.23	7.09	7.04	7.33	7.25	6.56
