# Supplementary material for: New Insights into the Diversity and Pathogenicity of Fusarium Species Causing Carnation Wilt in Lam Dong, Vietnam
Source: Research Square preprint supplement (doi:10.21203/rs.3.rs-6859853/v1), 2025-06-13
Supplement: Supplementary file 2 [file 3a106f8194c2db429fd1f8a6.docx]

**Table S2:** A list of reference strains of *Fusarium* spp. obtained from GenBank was used for phylogenetic analysis.

| **No** | **Species** | **Strains** | **Hosts/resource** | **Country** | **ITS/*TEF-1α* accession numbers** |
| --- | --- | --- | --- | --- | --- |
| 1 | *F. annulatum* | [LC13668](https://www.fusarium.org/details/23/1692) | *Musa nana* | China | MW016489/MW580529 |
| 2 | *F. annulatum* | [LC13671](https://www.fusarium.org/details/23/1695) | *Musa nana* | China | MW016492/MW580532 |
| 3 | *F. caulendophyticum** | [GUCC 191050.1](https://www.fusarium.org/details/23/2889) | *Rosa roxburghii*(healthy stems) | China | MZ724828/OR043881 |
| 4 | *F. caulendophyticum* | [GUCC 191050.2](https://www.fusarium.org/details/23/2890) | *Rosa roxburghii*(healthy stems) | China | OR034254/OR043882 |
| 5 | *F. cerealis* | [CBS 589.93](https://www.fusarium.org/details/23/1397) | *Iris hollandica* (bulb) | Netherlands | AF006340/AF212465 |
| 6 | *F. citri* | [LC13695](https://www.fusarium.org/details/23/1743) | *Castanopsis boisii* | China | MW016522/MW594365 |
| 7 | *F. citri* | [LC13697](https://www.fusarium.org/details/23/1745) | *Smilax corbularia* | China | MW016524/MW594367 |
| 8 | *F. compactum* | [NRRL 36318](https://www.fusarium.org/details/23/123) | --- | --- | GQ505735/GQ505646 |
| 9 | *F. compactum* | [NRRL 28029](https://www.fusarium.org/details/23/124) | Human eye (corneal transplant) | USA | GQ505691/GQ505602 |
| 10 | *F. culmorum* | [BE19-009002](https://www.fusarium.org/details/23/1199) | Garden soil | Belgium | MZ890547/MZ921900 |
| 11 | *F. curvatum* | [JW 39001](https://www.fusarium.org/details/23/1208) | Garden soil | Netherlands | MZ890510/MZ921853 |
| 12 | *F. curvatum* | [KG003](https://www.fusarium.org/details/23/2106) | *Triticum aestivum* (roots) | Kazakhstan | ON951728/ON960698 |
| 13 | *F. duofalcatisporum** | [NRRL 36448](https://www.fusarium.org/details/23/150) | *Phaseolus vulgaris* (seed) | Sudan | GQ505741/GQ505652 |
| 14 | *F. equiseti* | [NRRL 36136](https://www.fusarium.org/details/23/1422) | --- | --- | MH854570/GQ505644 |
| 15 | *F. equiseti* | [NRRL 20697](https://www.fusarium.org/details/23/1425) | *Beta vulgaris* (root) | Chile | MH858038/GQ505594 |
| 16 | *F. fujikuroi* | [LC13633](https://www.fusarium.org/details/23/1780) | *Glycine max* | USA | MW016432/MW580472 |
| 17 | *F. fujikuroi* | [LC13634](https://www.fusarium.org/details/23/1781) | *Acer palmatum* | Japan | MW016433/MW580473 |
| 18 | *F. graminearum* | [LC13775](https://www.fusarium.org/details/23/1818) | *Zea mays* | USA | MW016611/MW620072 |
| 19 | *F. guilinense* | [NRRL 32865](https://www.fusarium.org/details/23/190) | Human endocarditis | Brazil | GQ505703/GQ505614 |
| 20 | *F. hainanense* | [NRRL 26417](https://www.fusarium.org/details/23/194) | Leaf litter | Cuba | GQ505687/GQ505598 |
| 21 | *F. hainanense* | [NRRL 28714](https://www.fusarium.org/details/23/1443) | *Acacia* sp. (branch) | Costa Rica | GQ505693/GQ505604 |
| 22 | *F. incarnatum* | [LC13705](https://www.fusarium.org/details/23/1841) | Soil | China | MW016532/MW594375 |
| 23 | *F. incarnatum* | [NRRL 13379](https://www.fusarium.org/details/23/206) | *Oryza sativa* | India | GQ505680/GQ505591 |
| 24 | *F. irregulare* | [NRRL 32175](https://www.fusarium.org/details/23/1455) | Human (sputum) | USA | GQ505698/GQ505609 |
| 25 | *F. irregulare* | [NRRL 34011](https://www.fusarium.org/details/23/1466) | Human (sputum) | USA | GQ505723/GQ505634 |
| 26 | *F. luffae* | [CQ1038](https://www.fusarium.org/details/23/1871) | Humulus (leaf) | China | MK280852/MK289569 |
| 27 | *F. nanum* | [LC1385](https://www.fusarium.org/details/23/1885) | *Solanum lycopersicum* | Saudi Arabia | MK280781/MK289612 |
| 28 | *F. nanum* | [LC1516](https://www.fusarium.org/details/23/1886) | *Solanum lycopersicum* | Saudi Arabia | MK280782/MK289613 |
| 29 | *F. nirenbergiae* | [NRRL 36261](https://www.fusarium.org/details/23/285) | *Musa* sp. | --- | MH854824/MH484956 |
| 30 | *F. nirenbergiae* | [JW 124027](https://www.fusarium.org/details/23/1257) | Garden soil | Netherlands | MZ890523/MZ921868 |
| 31 | *F. nirenbergiae* | [JW 289011](https://www.fusarium.org/details/23/1259) | Garden soil | Netherlands | MZ890526/MZ921871 |
| 32 | *F. nirenbergiae* | [NL19-053002](https://www.fusarium.org/details/23/1250) | Garden soil | Netherlands | MZ890529/MZ921874 |
| 33 | *F. nirenbergiae* | [NL19-28011](https://www.fusarium.org/details/23/1253) | Garden soil | Netherlands | MZ890532/MZ921876 |
| 34 | *F. nirenbergiae* | [NL19-99011](https://www.fusarium.org/details/23/1256) | Garden soil | Netherlands | MZ890535/MZ921879 |
| 35 | *F. nygamai** | [NRRL 13448](https://www.fusarium.org/details/23/293) | *Sorghum bicolor* (necrotic root) | Australia | MH862671/MT011009 |
| 36 | *F. odoratissimum* | [LC13762](https://www.fusarium.org/details/23/1900) | *Musa* sp. | China | MW016596/MW594349 |
| 37 | *F. odoratissimum* | [LC13763](https://www.fusarium.org/details/23/1901) | *Musa* sp. | China | MW016597/MW594350 |
| 38 | *F. oxysporum* | [JW 11005](https://www.fusarium.org/details/23/1261) | Garden soil | Netherlands | MZ890536/MZ921881 |
| 39 | *F. oxysporum* | [JW 257006](https://www.fusarium.org/details/23/1265) | Garden soil | Netherlands | MZ890537/MZ921883 |
| 40 | *F. oxysporum* | [NL19-94002](https://www.fusarium.org/details/23/1263) | Garden soil | Netherlands | MZ890538/MZ921884 |
| 41 | *F. oxysporum* | [NL19-94008](https://www.fusarium.org/details/23/1264) | Garden soil | Netherlands | MZ890539/MZ921885 |
| 42 | *F. pernambucanum* | [LC7019](https://www.fusarium.org/details/23/1915) | *Musa paradisiaca* (Leaf) | China, | MK280816/MK289625 |
| 43 | *F. pernambucanum* | [NRRL 32864](https://www.fusarium.org/details/23/303) | Human | USA | GQ505702/GQ505613 |
| 44 | *F. pernambucanum* | [NRRL 34070](https://www.fusarium.org/details/23/1486) | Cotton | USA | GQ505731/GQ505642 |
| 45 | *F. pernambucanum* | [URM 6801](https://www.fusarium.org/details/23/302) | *Dactylopius opuntiae* | Brazil | MH668834/LS398483 |
| 46 | *F. persicinum* | [CBS 143596](https://www.fusarium.org/details/23/1489) | *Stereum hirsutum* | Iran | LT970815/LT970779 |
| 47 | *F. persicinum* | [CBS 143598](https://www.fusarium.org/details/23/1491) | Smut | Iran | LT970816/LT970780 |
| 48 | *F. sulawesiense* | [Indo186](https://www.fusarium.org/details/23/1519) | *Musa* sp. var. Pisang Kepok | Indonesia | LS479414/LS479449 |
| 49 | *F. sulawesiense* | [LC12177](https://www.fusarium.org/details/23/1974) | *Colocasia esculenta* | China | MK280809/MK289609 |
| 50 | *F. sulawesiense* | [LC13720](https://www.fusarium.org/details/23/1976) | *Oryza* sp. | China | MW016547/MW594390 |
| 51 | *F. sulawesiense* | [NRRL 34056](https://www.fusarium.org/details/23/1521) | Cotton | USA | GQ505729/GQ505640 |
| 52 | *F. sulawesiense* | [NRRL 34059](https://www.fusarium.org/details/23/1522) | Cotton | USA | GQ505730/GQ505641 |
| 53 | *F. tanahbumbuense* | [NRRL 43297](https://www.fusarium.org/details/23/1527) | *Spartina rhizomes* | USA | GQ505746/GQ505657 |
| 54 | *F. thapsinum* | [LC13687](https://www.fusarium.org/details/23/1991) | *Sorghum bicolor* | USA | MW016514/MW580554 |
| 55 | *F. thapsinum* | [LC13688](https://www.fusarium.org/details/23/1992) | *Glycine max* | USA | MW016515/MW580555 |
| 56 | *F. toxicum* | [NL19-041006](https://www.fusarium.org/details/23/1299) | Garden soil | Netherlands | MZ890503/MZ921846 |
| 57 | *N. solani*** | [NRRL 66304](https://www.fusarium.org/details/23/738) | *Solanum tuberosum* (tuber) | Slovenia | KT313633/KT313611 |
| 58 | *N. solani* | [LC13842](https://www.fusarium.org/details/23/2055) | *Acer palmatum* | Japan | MW016728/MW620189 |

Notes: * = ex-type; ** = ex-epitype; ‘---' = unknown
